# Supplementary material for: White-light emission from simple AIE–ESIPT-excimer tripled single molecular system
Source: Royal Society of Chemistry journal article supplement (doi:10.1039/c6nj03070j), 2016-12-21
Supplement: c6nj03070j1.pdf [file c6nj03070j1.pdf]

## **Electronic Supplementary Information**

### **White light emission from simple AIE-ESIPT-Excimer tripled single molecular system**

*Soham Samanta, Utsab Manna and Gopal Das\**

Department of Chemistry

Indian Institute of Technology Guwahati, Guwahati 781039, Assam, India

E-mail: gdas@iitg.ernet.in

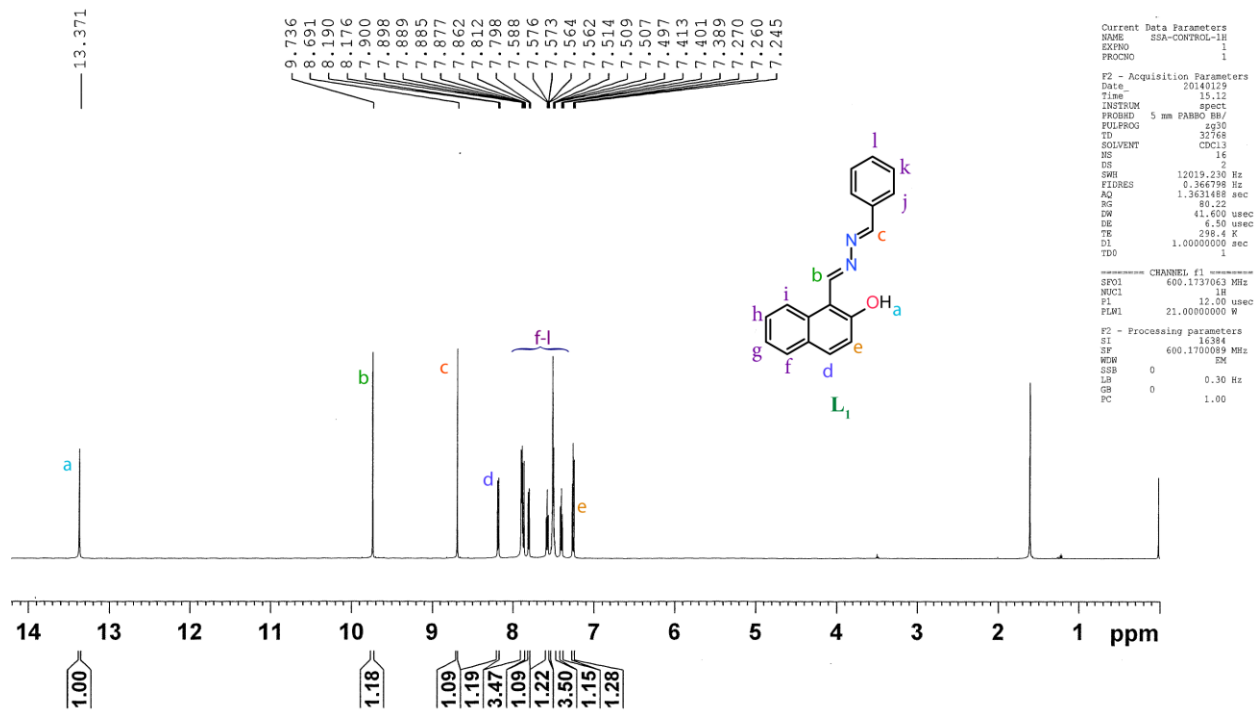

Figure S1:  $^1\text{H-NMR}$  spectra of  $L_1$ .

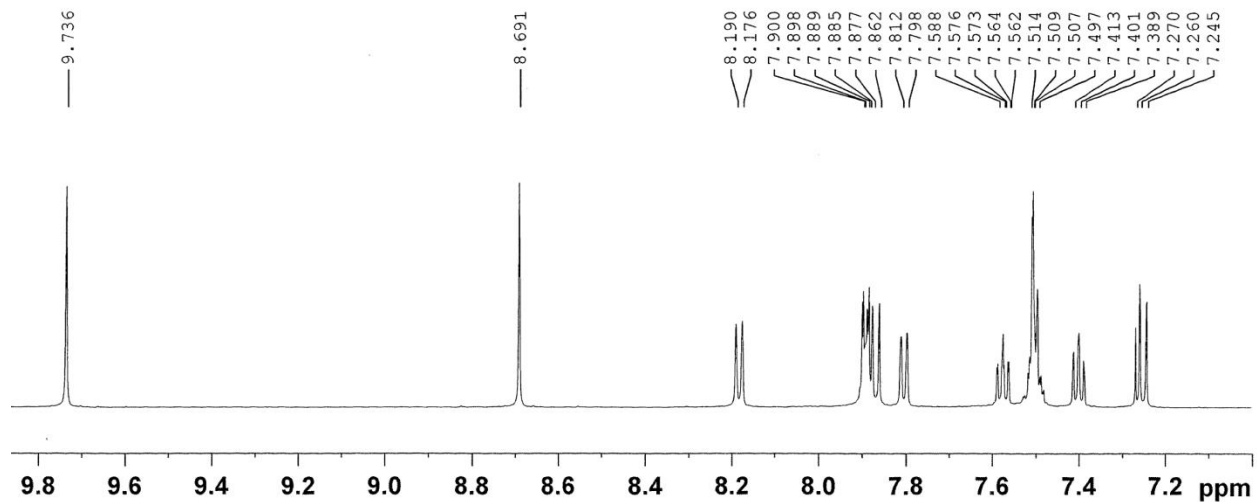

Figure S2: Expanded  $^1\text{H-NMR}$  spectra of  $L_1$ .

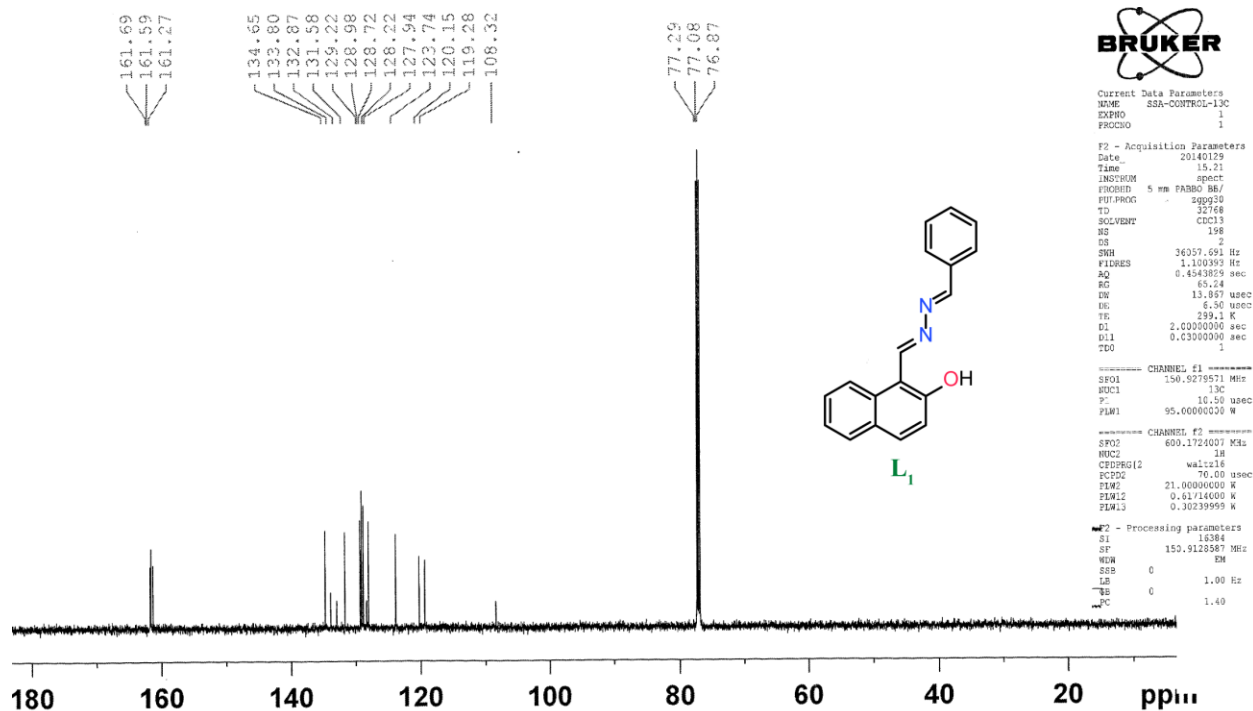

Figure S3: <sup>13</sup>C-NMR spectra of L<sub>1</sub>.

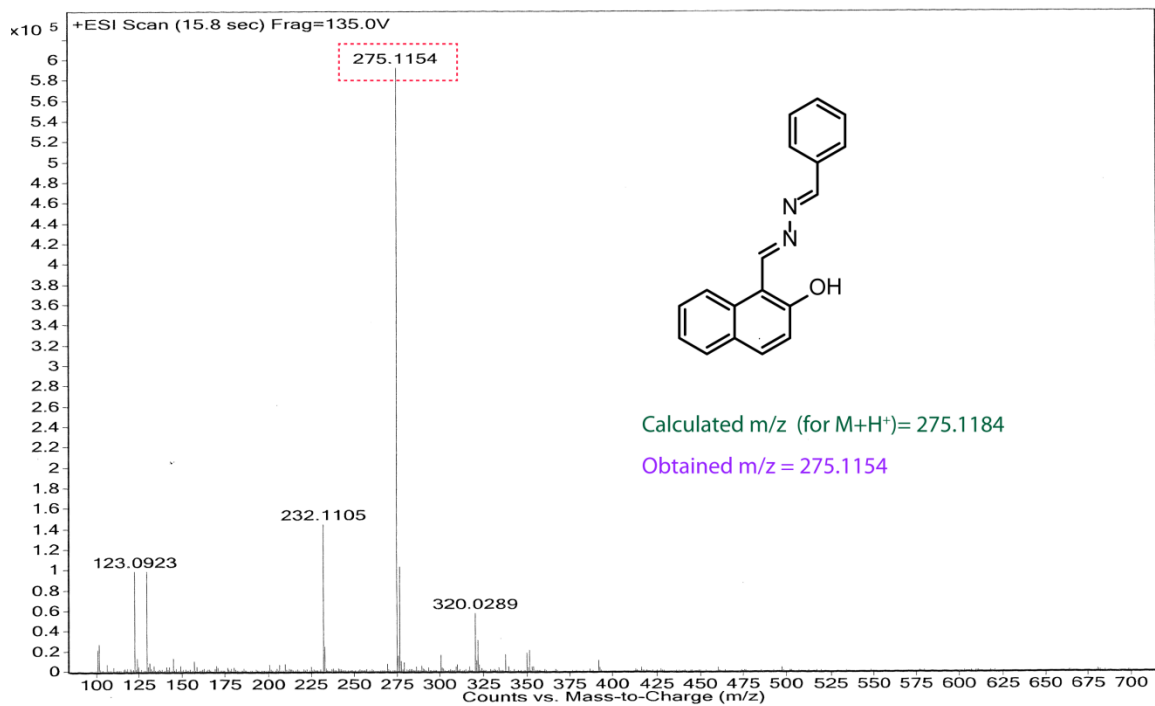

Figure S4: Mass spectrum of L<sub>1</sub>.

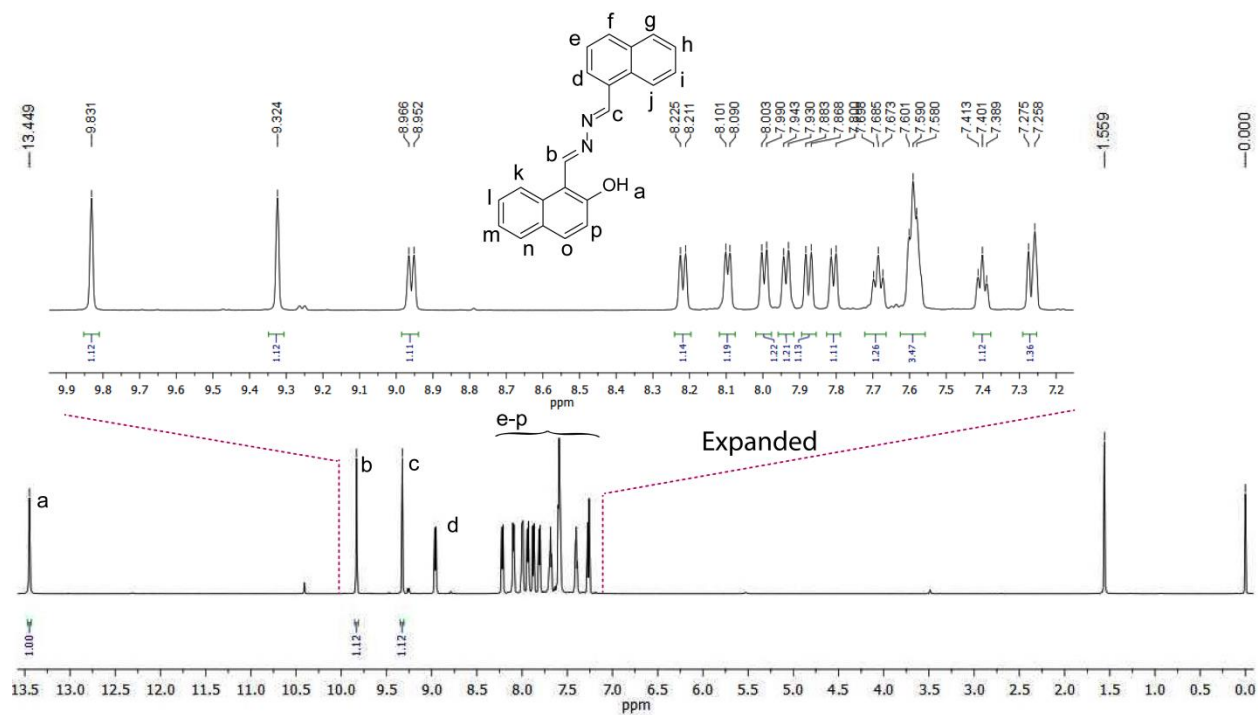

**Figure S5: <sup>1</sup>H-NMR spectra of L<sub>2</sub>.**

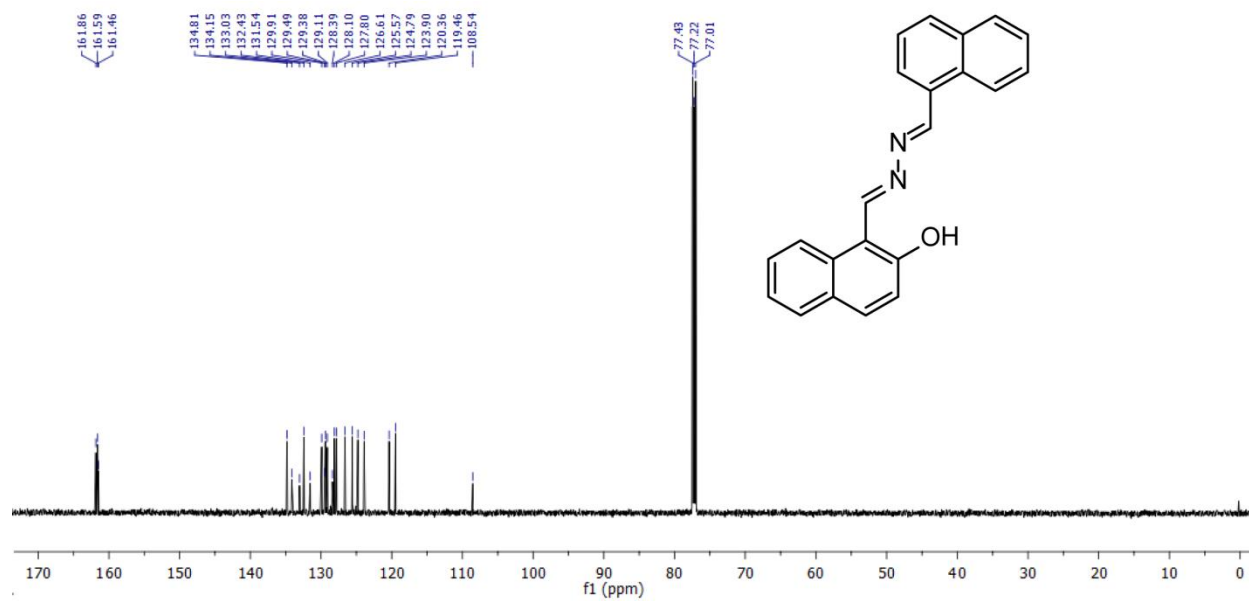

**Figure S6: <sup>13</sup>C-NMR spectra of L<sub>2</sub>.**

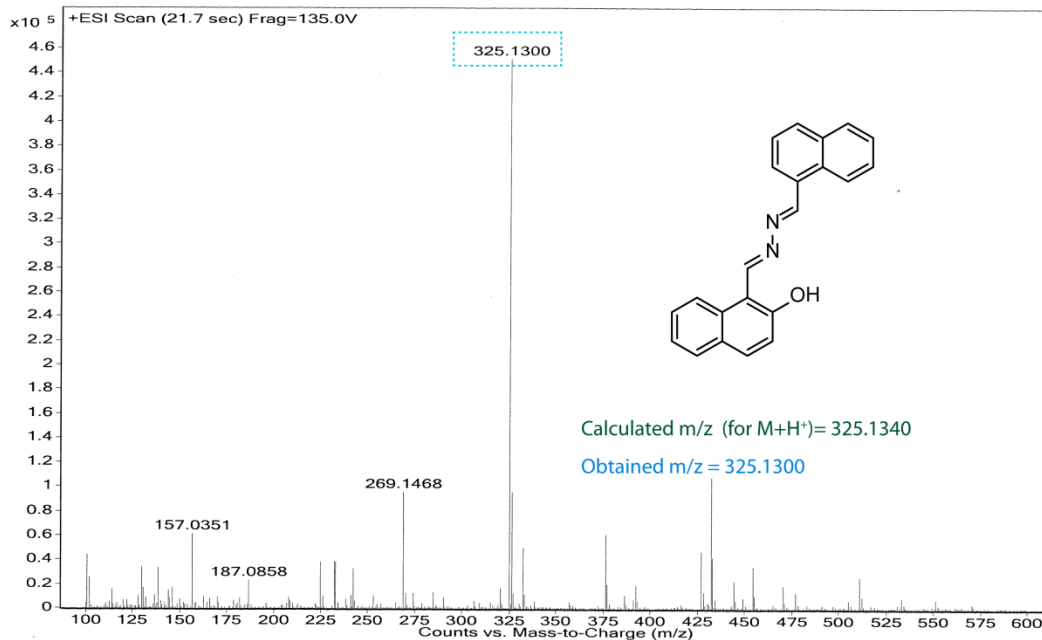

Figure S7: Mass spectrum of  $L_2$ .

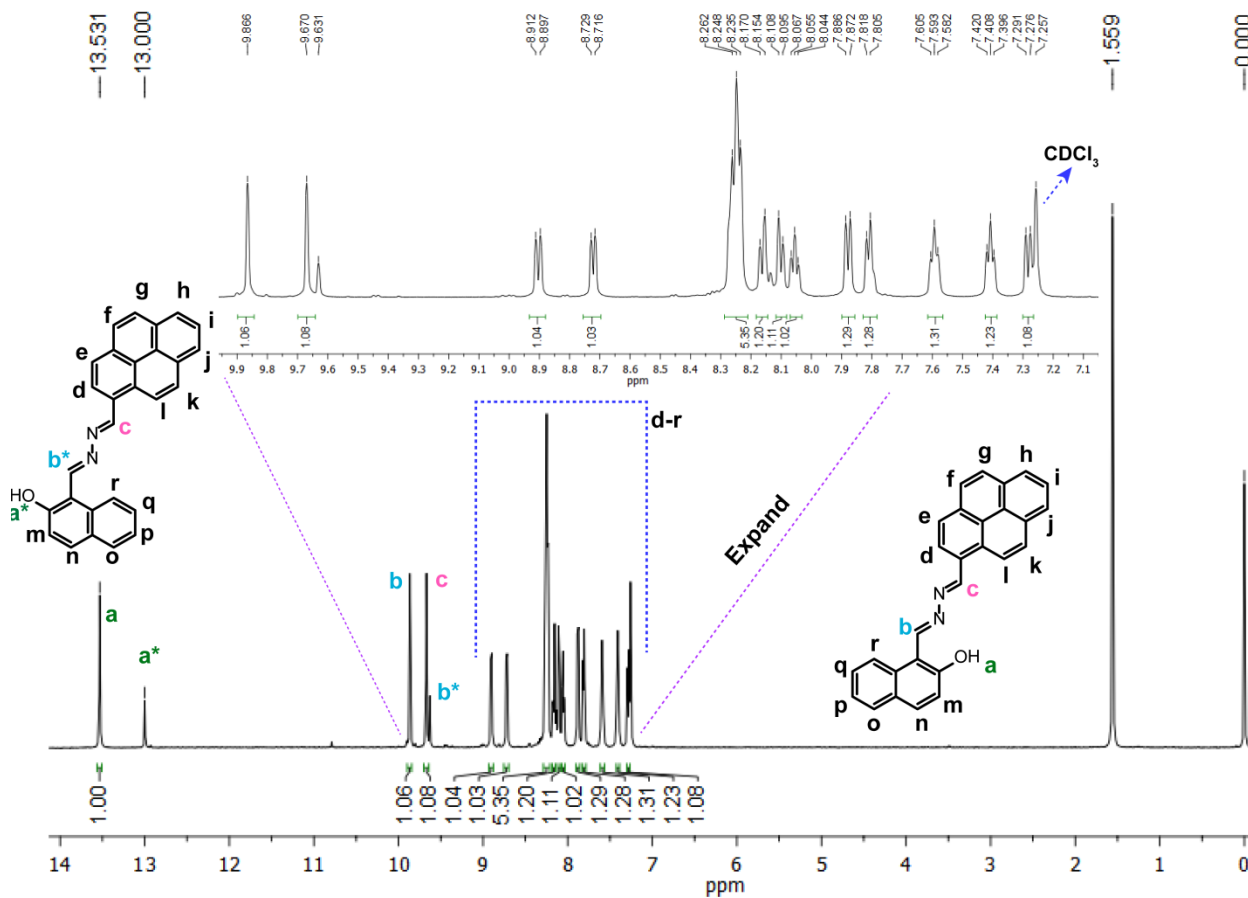

Figure S8:  $^1H$ -NMR spectra of  $L_3$ .

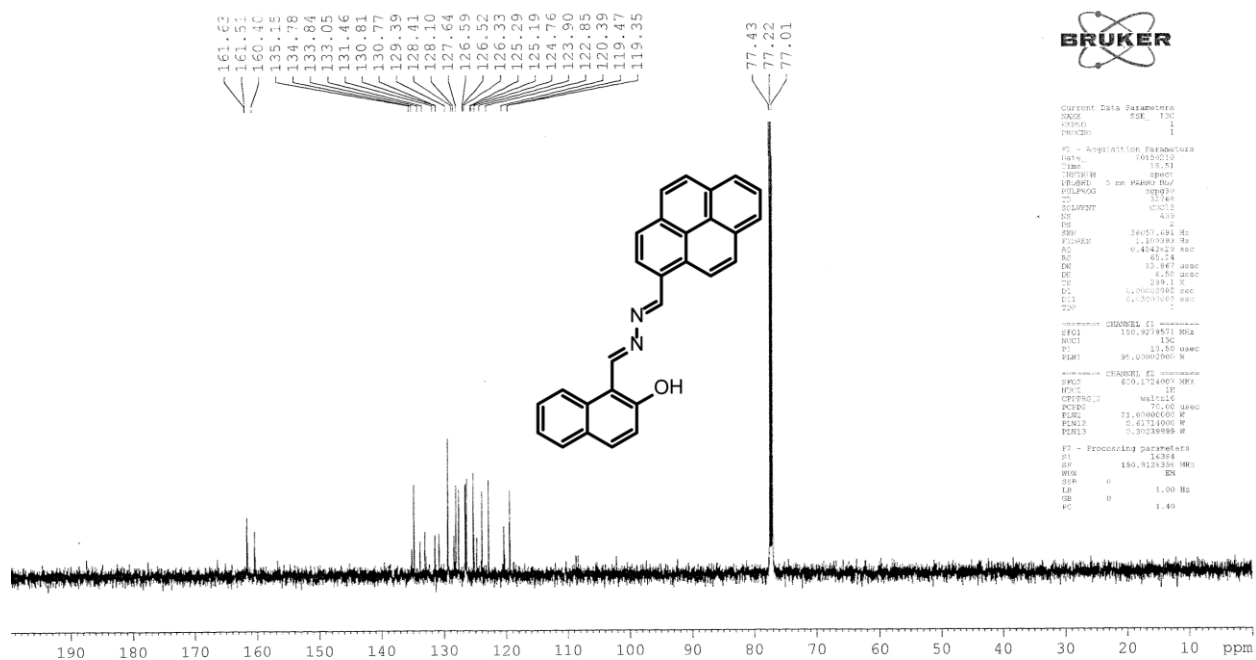

Figure S9:  $^{13}\text{C}$ -NMR spectra of **L3**.

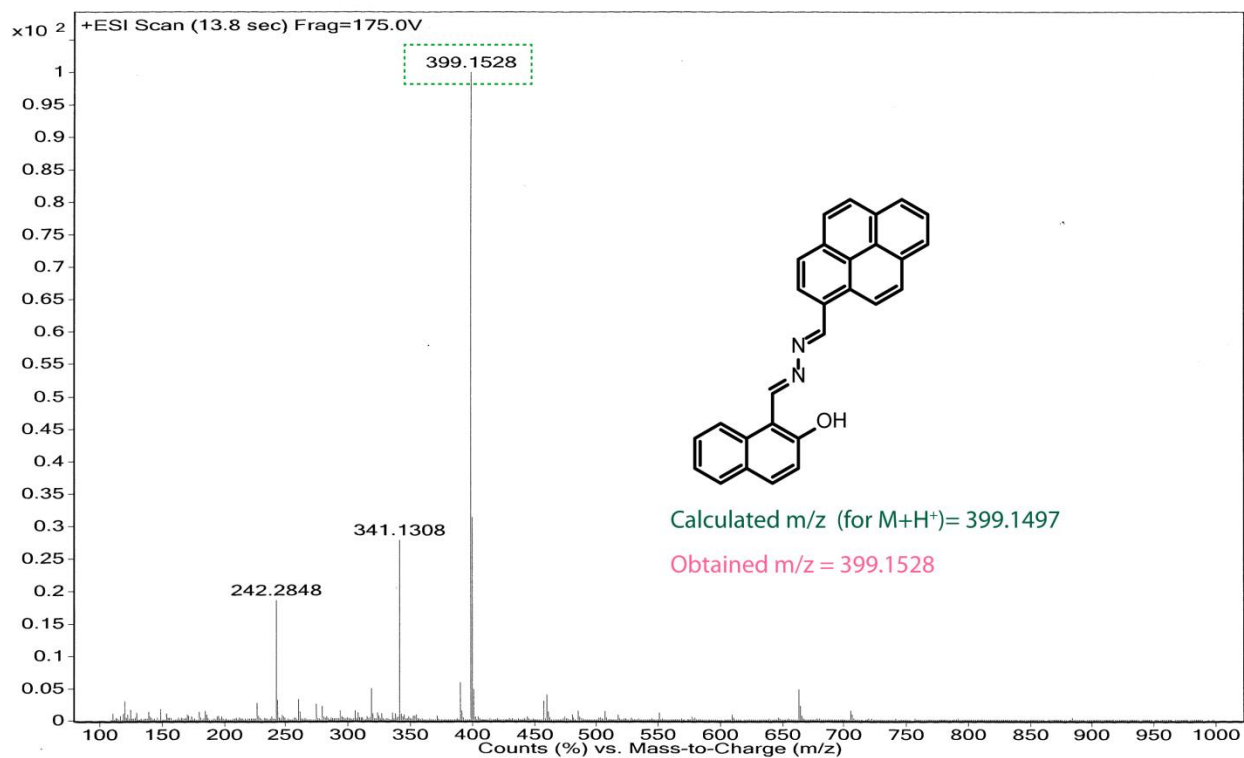

Figure S10: Mass spectrum of **L3**.

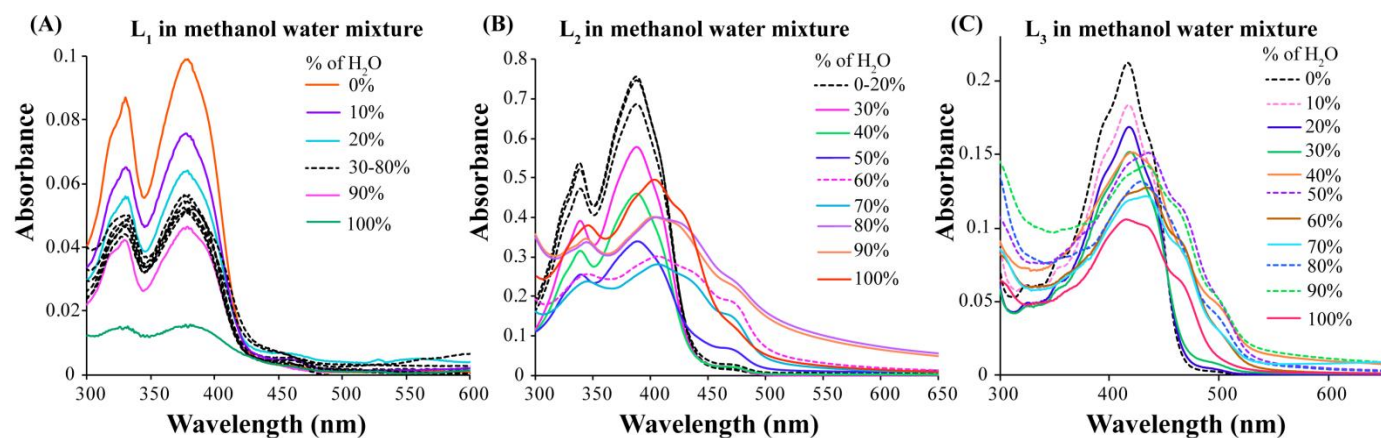

**Figure S11:** UV-vis spectra of  $L_1$  (25  $\mu\text{M}$ ) (A);  $L_2$  (25  $\mu\text{M}$ ) (B) and  $L_3$  (10  $\mu\text{M}$ ) (C) upon changing the water fraction of methanol-water mixed solvent.

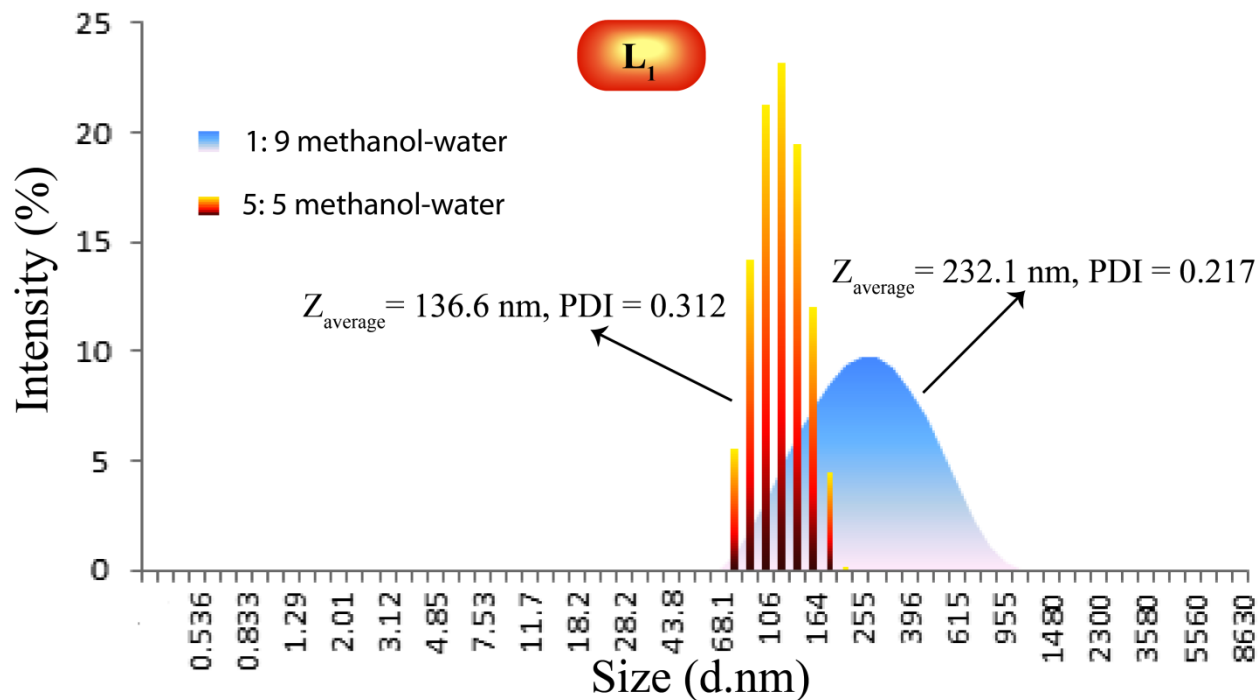

**Figure S12:** DLS-based particle size analysis of  $L_1$  (10  $\mu\text{M}$ ) upon changing the solvent from 5:5 methanol-water to 1:9 methanol-water.

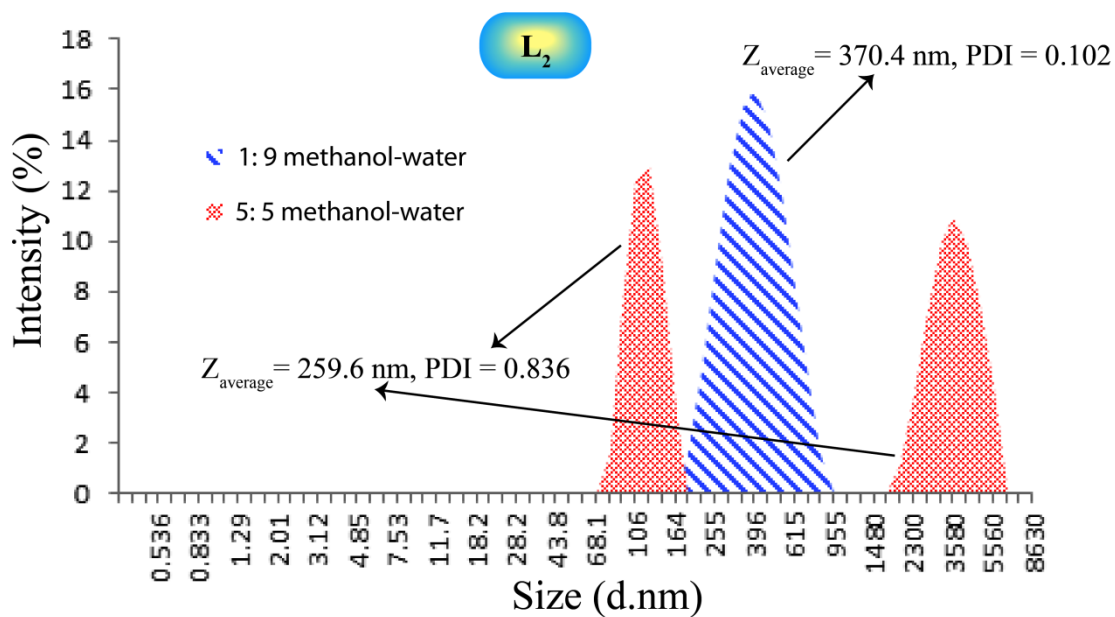

**Figure S13:** DLS-based particle size analysis of  $L_2$  (10 $\mu\text{M}$ ) upon changing the solvent from 5:5 methanol-water to 1:9 methanol-water.

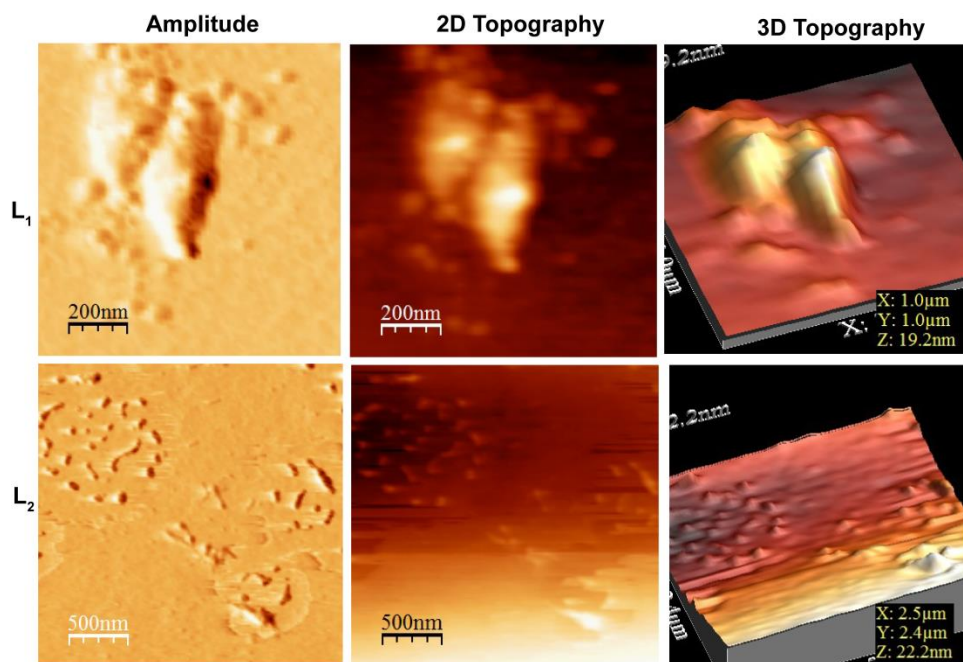

**Figure S14:** AFM images of the aggregates obtained from the drop casted solution of  $L_1$  (10  $\mu\text{M}$ ) and  $L_2$  (10  $\mu\text{M}$ ) in 1:9 methanol-water mixed solvent.



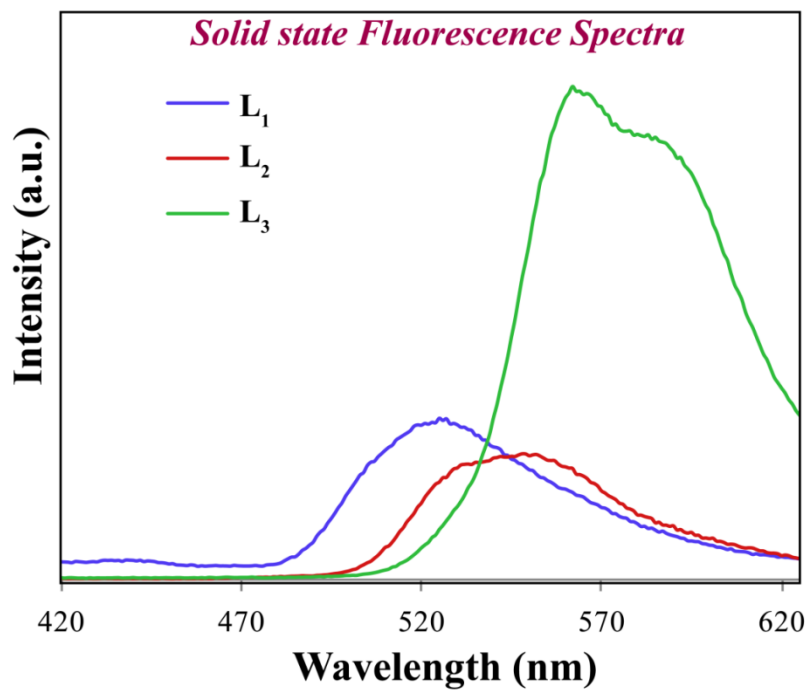

**Figure S15:** Solid state/film state fluorescence spectra of  $L_1$ ,  $L_2$  and  $L_3$ ;  $\lambda_{ex}=380$  nm.

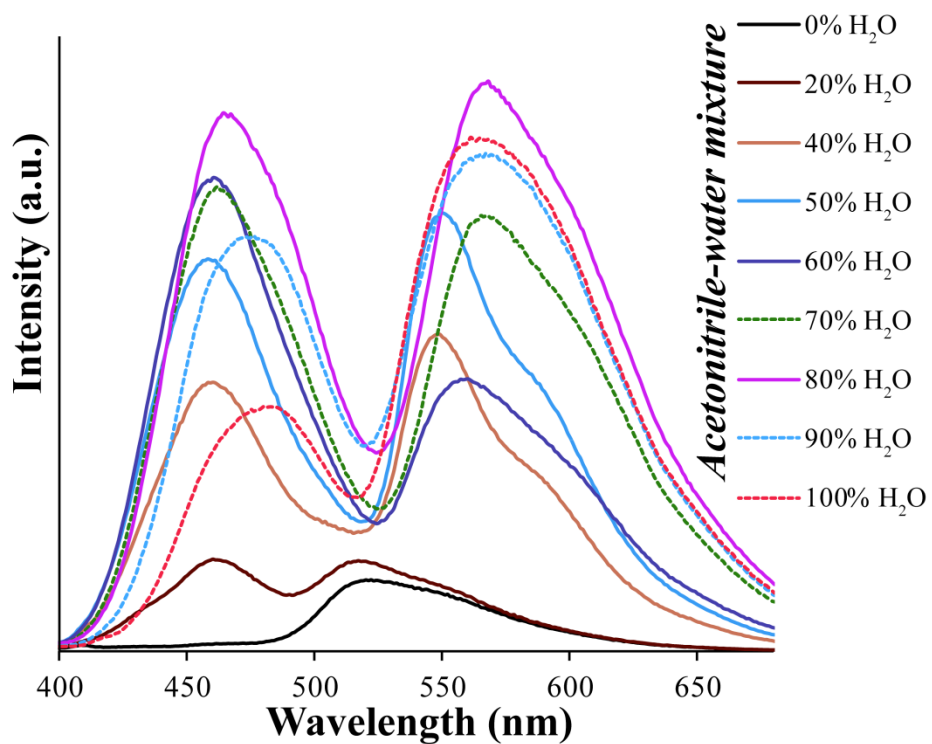

**Figure S16:** Fluorescence spectra of  $L_3$  ( $10\ \mu\text{M}$ ); upon changing the water fraction of acetonitrile-water mixed solvent;  $\lambda_{\text{ex}} = 365\ \text{nm}$

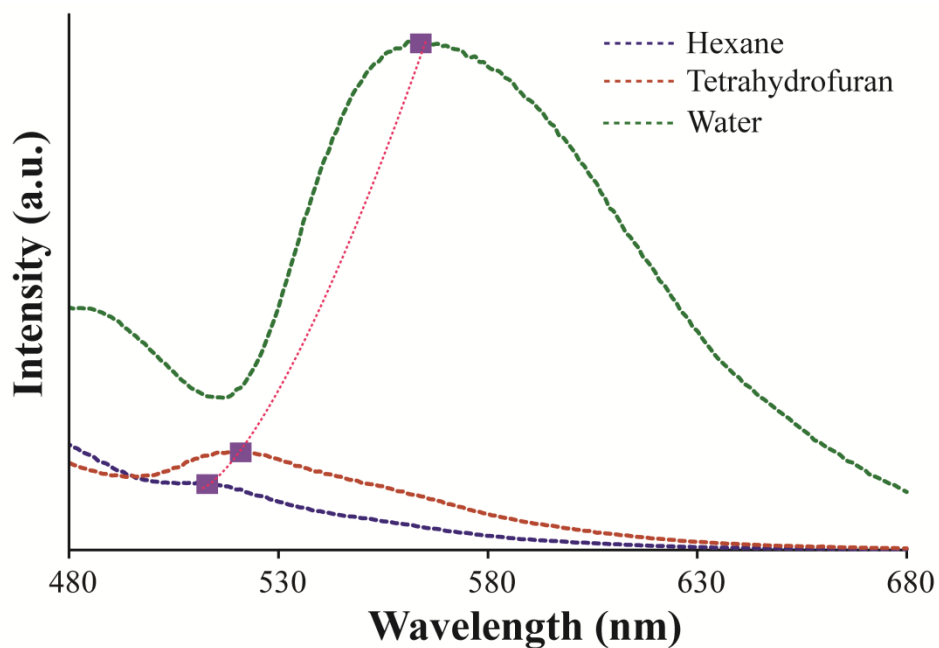

**Figure S17:** Fluorescence spectra of  $L_3$  in different solvents;  $\lambda_{\text{ex}} = 380\ \text{nm}$ .

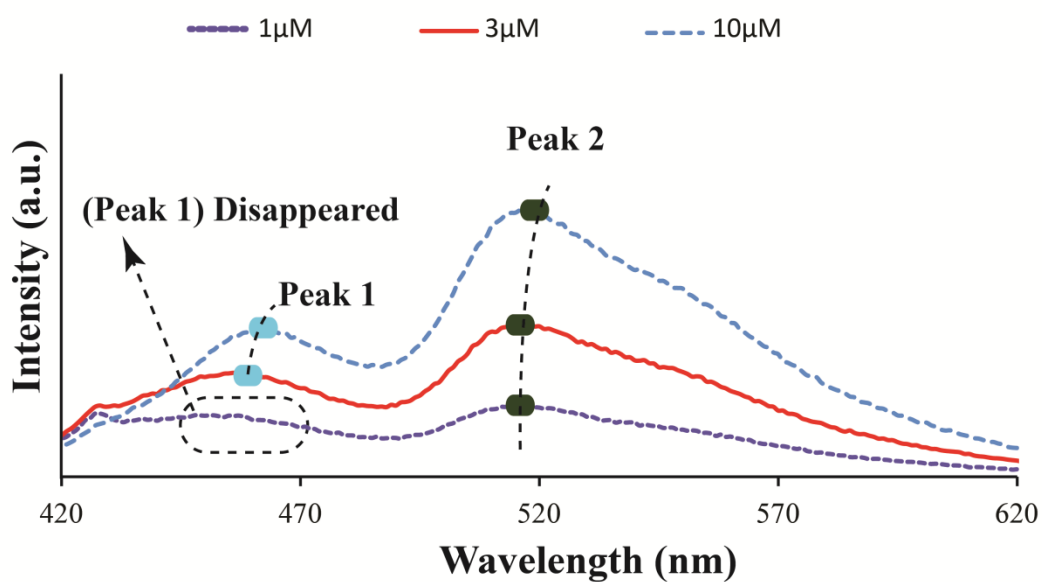

**Figure S18:** Fluorescence spectra of  $L_3$  in methanol upon increasing concentration ( $1\ \mu\text{M}$ - $10\ \mu\text{M}$ ).

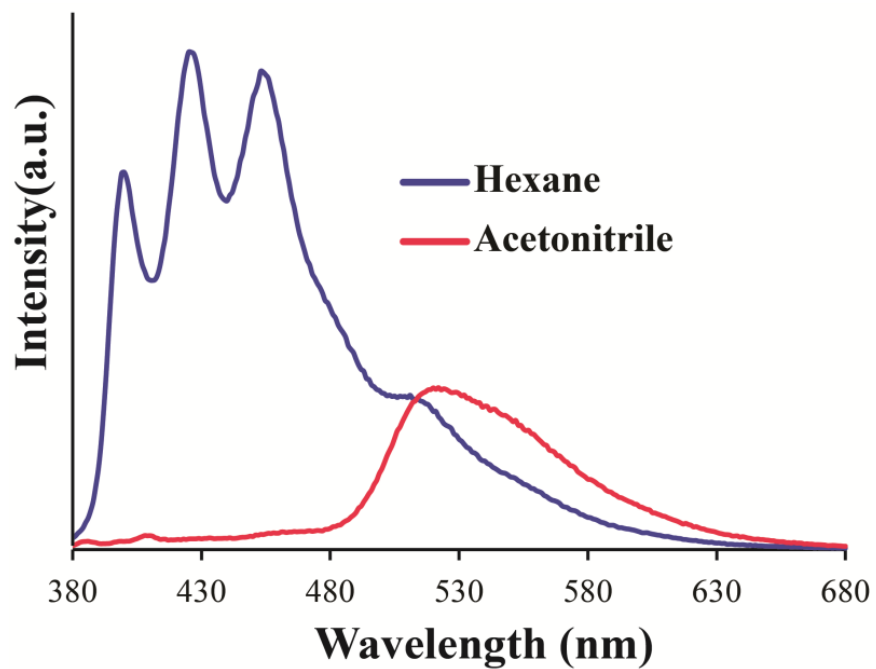

**Figure S19:** Fluorescence spectra of  $L_3$  in Hexane and acetonitrile;  $\lambda_{\text{ex}}=365$  nm.

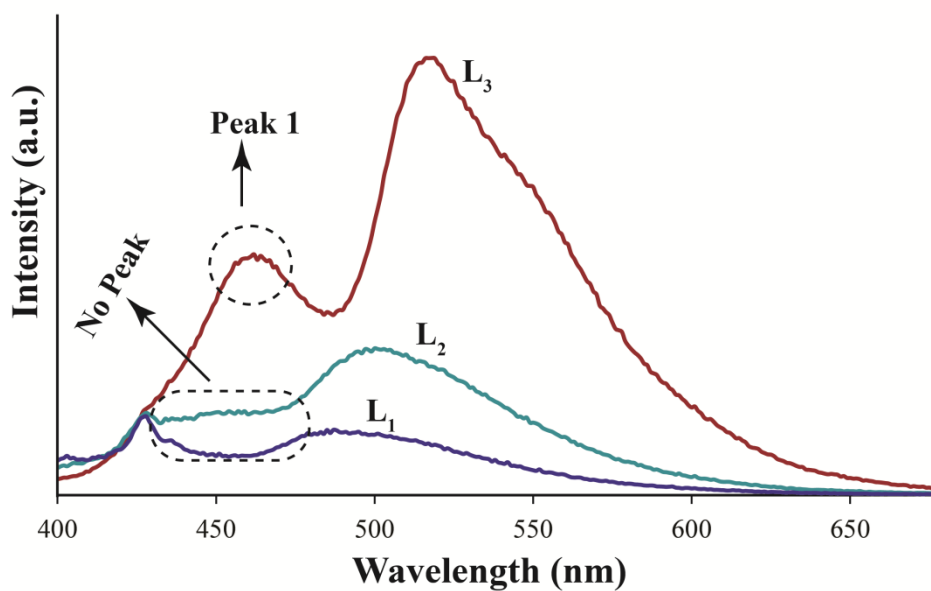

**Figure S20:** Fluorescence spectra of  $L_1$ ,  $L_2$  and  $L_3$  (10  $\mu\text{M}$ ) in methanol.
